# Supplementary material for: The Role of Bifidobacterium in Liver Diseases: A Systematic Review of Next-Generation Sequencing Studies
Source: Microorganisms. 2023 Dec 17;11(12):2999. doi: 10.3390/microorganisms11122999 (PMC10745637; doi:10.3390/microorganisms11122999)
Supplement: Supplementary file 1 [file microorganisms-11-02999-s001.zip › Supplementary File 3.xlsx]

## Sheet: Observational_disease
Id	Authors	Year	Country	Disease	Population	Type of study	Type of sample	NGS Tecnology	Type of sequencing	N	Groups	Up or down in disease	Up or down identification method	DataBase used
1	Gu, Z. et al.	2020	China	ALD	Animal	Preclinical study	Cecum	Illumina/MiSeq	V4	64	7 control/ 12 ALD/ 15 ALD+treatment low dose/ 15 ALD+treatment medium dose/ 15 ALD+treatment high dose	Down	Not informed	Ribosomal Database Project (RDP)
2	Zhang, X. et al.	2021	China	HCC	Animal	Preclinical study	Stool	Illumina/MiSeq	V4	98	59 NAFLD-HCC/ 39 control	Down	Not informed	SILVA	v.123
3	Huo, R. et al.	2023	China	HCC	Human	Case-control	Stool	Illumina/MiSeq	V3-V4	40	20 HCC/ 20 control	Down	LEfSe	Not informed
4	Kajihara, M. et al.	2019	Japan	HCC	Human	Cross-sectional	Peripheral blood	Illumina/MiSeq	V3-V4	80	66 Cirrhotic patients (and among them, 8 have ALD and 10 have NASH as well)/ 14 Control	Down	LEfSe	Greengenes
5	Ponziani, F.R. et al.	2019	Italy	HCC	Human	Case-control	Stool	Illumina/MiSeq	V3-V4	61	21 NAFLD+Cirrhosis+HCC/ 20 NAFLD+Cirrhosis/ 20 control	Down	LEfSe	Greengenes
6	Wei, X. et al.	2013	China	Cirrhosis	Human	Case-control	Stool	Illumina/Solexa sequencing	Metagenomic shotgun	240	120 cirrhosis/ 120 control	Up	Two-tailed Wilcoxon rank-sum test	NCBI nr database
7	Dubinkina, V.B. et al.	2017	Russia	Cirrhosis	Human	Cohort	Stool	SOLiD 5500	Metagenomic shotgun	159	27 Cirrhosis/ 72 Alcohol Dependence Syndrome (ADS)/ 60 Control	Up	Mann-Whitney U test	MetaPhIAn v2.0
8	Juárez-Fernández, M. et al.	2021	Spain	NAFLD	Animal	Preclinical study	Stool	Illumina MiSeq	V3-V4	60	30 control/ 30 high fat diet (NAFLD)	Up	Mann-Whitney U test	Greengenes
9	Kang, K. et al.	2021	China	NAFLD	Animal	Preclinical study	Intestinal contents	Novogene/IonS5	V3-V4	28	7 AFLD/ 7 AFLD Control/ 7 MAFLD/ 7 MAFLD Control	Down	Student's t-test	SILVA	Version not informed
10	Liu, J.J. et al.	2023	China	NAFLD	Animal	Preclinical study	Stool	Illumina/NovaSeq	Metagenomic shotgun	66	11 Control (ND)/ 11 NAFLD (HFD)/ 11 HFD+OCA/ 11 HFD+A/ 11 HFD+A+OCA/ 11 Fecal Microbiota Transplantation (FMT)	Down	LEfSe	MetaPhIAn v2.1.0
11	Zhang, Z. et al	2021	China	NAFLD	Animal	Preclinical study	Stool	Illumina/MiSeq	V4-V5	18	6 control/ 6 NAFLD/ 6 NAFLD+prebioctic	Up	LEfSe	SILVA	Version not informed
12	Li, W.F. et al.	2018	China	NAFLD	Animal	Preclinical study	Colonic luminal contents	Illumina/MiSeq	V3-V4	32	8 control/ 8 NAFLD/ 16 NAFLD+treatment	Down	LEfSe	SILVA	Version not informed
13	Zhang, B. et al.	2023	China	NAFLD	Animal	Preclinical study	Stool	Illumina/NovaSeq	V3-V4	60	10 control/ 10 NAFLD/ 40 NAFLD+treatment	Down	LEfSe	Not informed
14	Ye, J.Z. et al.	2018	China	NASH	Animal	Preclinical study	Stool	Illumina/MiSeq	V3-V4	24	12 NASH/ 12 control	Down	LEfSe	SILVA	v.123
15	Nobili, V. et al.	2018	Italy	NASH	Human	Case-control	Stool	Roche/GS Junior plataform	V1-V3	115	61 NASH/ 54 control	Down	Kruskal-Wallis H test	Greengenes
16	Duarte, S.M.B. et al.	2018	Brazil	NASH	Human	Cross-sectional	Stool	PGM	V4	23	13 NASH/ 10 controls	Down	Kruskal-Wallis H test	Not informed
17	Pan, X. et al.	2021	China	NASH	Human	Case-control	Stool	Illumina/MiSeq	V4	75	25 NAFLD/ 25 NASH/ 25 control	Down	Not informed	Greengenes

## Sheet: Observational_treatment
Id	Authors	Year	Country	Disease	Population	Type of study	Type of sample	NGS Tecnology	Type of sequencing	N	Groups	Treatment	Up or down by treatment	Outcome	Up or down identification method	DataBase used
1	Warner, J. et al	2021	USA	ALD	Animal	Preclinical study	Stool	Illumina/HiSeq	V3-V4	36	6 Control/ 14 ALD/ 16 ALD+Treatment (hBD-2)	Human Beta Defensin 2 (hBD-2)	Up	Reduction of EtOH-associated liver steatosis, hepatocellular death, and inflammation was different between cohorts, suggesting microbiota-specific mechanisms underlying the beneficial effects of hBD-2	LEfSe	SILVA	Version not informed
2	Lin, Y. et al.	2021	China	ALD	Animal	Preclinical study	Stool	Illumina/MiSeq	V3-V4	40	10 control/ 10 ALD/ 10 ALD + low-dose AAM/ 10 ALD + high-dose AAM	Auricularia auricula Melanin (AMM)	Up	Suppress the reproduction of harmful bacteria, ameliorate gastrointestinal barrier function and reduce the secretion of proinflammatory cytokines	Not informed	Greengenes
3	Philips, C.A. et al.	2022	India	ALD	Human	Cohort	Stool	Illumina/MiSeq	V3-V4	72	47 ALD(SAH)+fecal microbiota transplantation/ 25 ALD(SAH) + Pentoxifylline	Fecal transplant or pentoxifylline	Up	Favorable modulation of intestinal bacterial communities. Network analysis showed beneficial taxa (Bifidobacterium) as a central influencer in those undergoing FMT at 6 months.	LEfSe	Greengenes
4	Ponziani, F.R. et al.	2022	Italy	HCC	Human	Cohort	Stool	Illumina/MiSeq	V3-V4	11	6 HCC DC (responders)/ 5 HCC non-responders	Tremelimumab and Durvalumab	Up		DESeq2	Greengenes
5	Lu, H. et al	2021	China	Cirrhosis	Human	Case-control	Stool	Illumina/NovaSeq	Metagenomic shotgun	53	24 Cirrhosis/ 29 Control	Lactitol	Up	Endotoxin biosynthesis, and horizontal transfer of pathogenic genes were decreased	LEfSe	ChocoPhIAn
6	Zhang, Y. et al.	2018	China	NAFLD	Animal	Preclinical study	Stool	Illumina/HiSeq	V3-V4	69	12 NC/ 12 HDF/ 11 HFD+SLBZP16w/ 12 HFD+Probiotics16w/ 10 HFD/LPS4w/ 12 HFD/NS4w	Shenling Baizhu powder (SLBZP)	Up	Improved abundance of intestinal microbiota, alleviation in hepatic steatosis, and repair in colonic mucosa	Mann-Whitney U test	Greengenes
7	Yang, F. et al.	2021	China	NAFLD	Animal	Preclinical study	Stool	Illumina/MiSeq	Metagenomic shotgun	60	10 NF/ 10 HF/ 10 HF-EGCG/ 10 HF-L/ 10 HF-M/ 10 HF-N	Fu instant tea	Up	Improved microbiota dysbiosis and elevated short-chain fatty acids	LEfSe	SILVA	Version not informed
8	Bao, T. et al.	2020	China	NAFLD	Animal	Preclinical study	Stool	Illumina/MiSeq	V3-V4	60	15 control/ 15 NAFLD/ 15 control+inulin/ 15 NAFLD+inulin	Inulin	Up	Reduction of LPS leakage via protecting the gut mucosal barrier function	Not informed	Not informed
9	Yang, Z.D. et al.	2023	China	NAFLD	Animal	Preclinical study	Stool	Illumina/HiSeq	V3-V4	18	6 control/ 6 NAFLD/ 6 NAFLD+inulin	Inulin	Up	Elevated short-chain fatty acids	LEfSe	Not informed
10	Hu, W. et al.	2022	China	NAFLD	Animal	Preclinical study	Stool	Illumina/MiSeq	V3-V4	28	7 NC/ 7 HFD/ 7 HFD+A2-165/ 7 HFD+F.prausnitzii	Faecalibacterium prausnitzii LC49/LB8	Up	Upregulated tryptophan metabolism, glutathione metabolism, and valine, leucine, and isoleucine degradation, which might be related to NAFLD prevention	LEfSe	SILVA	v.132.99
11	Ghosh, S. et al	2020	China	NAFLD	Animal	Preclinical study	Stool	Illumina MiSeq	V3-V4	30	10 control/ 10 unrestricted acess to prebiotic/ 10 restricted acess to prebiotic	Inulin+Fructooligosaccharide+Xylooligosaccharide	Up	Elevated short-chain fatty acids	Mann-Whitney U test	SILVA	Version not informed
12	Abernathy, B.E. et al.	2021	USA	NAFLD	Animal	Preclinical study	Cecal contents	Illumina/MiSeq	V5-V6	72	12 control/ 12 NAFLD/ 48 NAFLD+treatment	Polylactose	Up	Reducing adiposity	Not informed	Not informed
13	Satapathy, S. et al.	2020	USA	NASH	Human	Cohort	Stool	Illumina/MiSeq	V4-V5	21	Patients who received liver transplant (LT) for NASH	Liver transplant (LT)	Up	Bifidobacteria seem to have a protective role against the development of NAFLD/NASH	LEfSe	Ribosomal Database Project (RDP)
14	Bomhof, M.R. et al.	2019	Canada	NASH	Human	Randomized clinical trial	Stool	Illumina/MiSeq	V3-V4	14	8 Prebiotic/ 6 placebo	Oligofructose	Up	Reduced liver steatosis, hepatocellular injury, inflammation, fibrosis, and overall NASH activity	Mann-Whitney U test	Ribosomal Database Project (RDP)
